# Supplementary material for: Two-component polymers embedded with tungsten oxide nanoparticles toward broadband and nonvolatile photomemory
Source: Royal Society of Chemistry journal article supplement (doi:10.1039/d2tc00739h), 2022-01-01
Supplement: d2tc00739h1.pdf [file d2tc00739h1.pdf]

Electronic Supplementary Information

**Two-component polymers embedded with tungsten oxide nanoparticles toward broadband and nonvolatile photomemory**

*Mingyue Zhang,<sup>†</sup> Jingying Miao,<sup>†</sup> Hongfang Liu,<sup>†</sup> Shencheng Fu,<sup>†,\*</sup> Xin Li,<sup>†</sup> Yuxin Tao,<sup>†</sup> Xiuping Qi<sup>†</sup> and Xintong Zhang<sup>†,\*</sup>*

<sup>†</sup>Center for Advanced Optoelectronic Functional Material Research, Northeast Normal University; and Key Laboratory of UV-Emitting Materials and Technology (Northeast Normal University), Ministry of Education, Changchun, 130024, P. R. China.

\*E-mail: fusc515@163.com (S.F.); xtzhang@nenu.edu.cn (X.Z.)

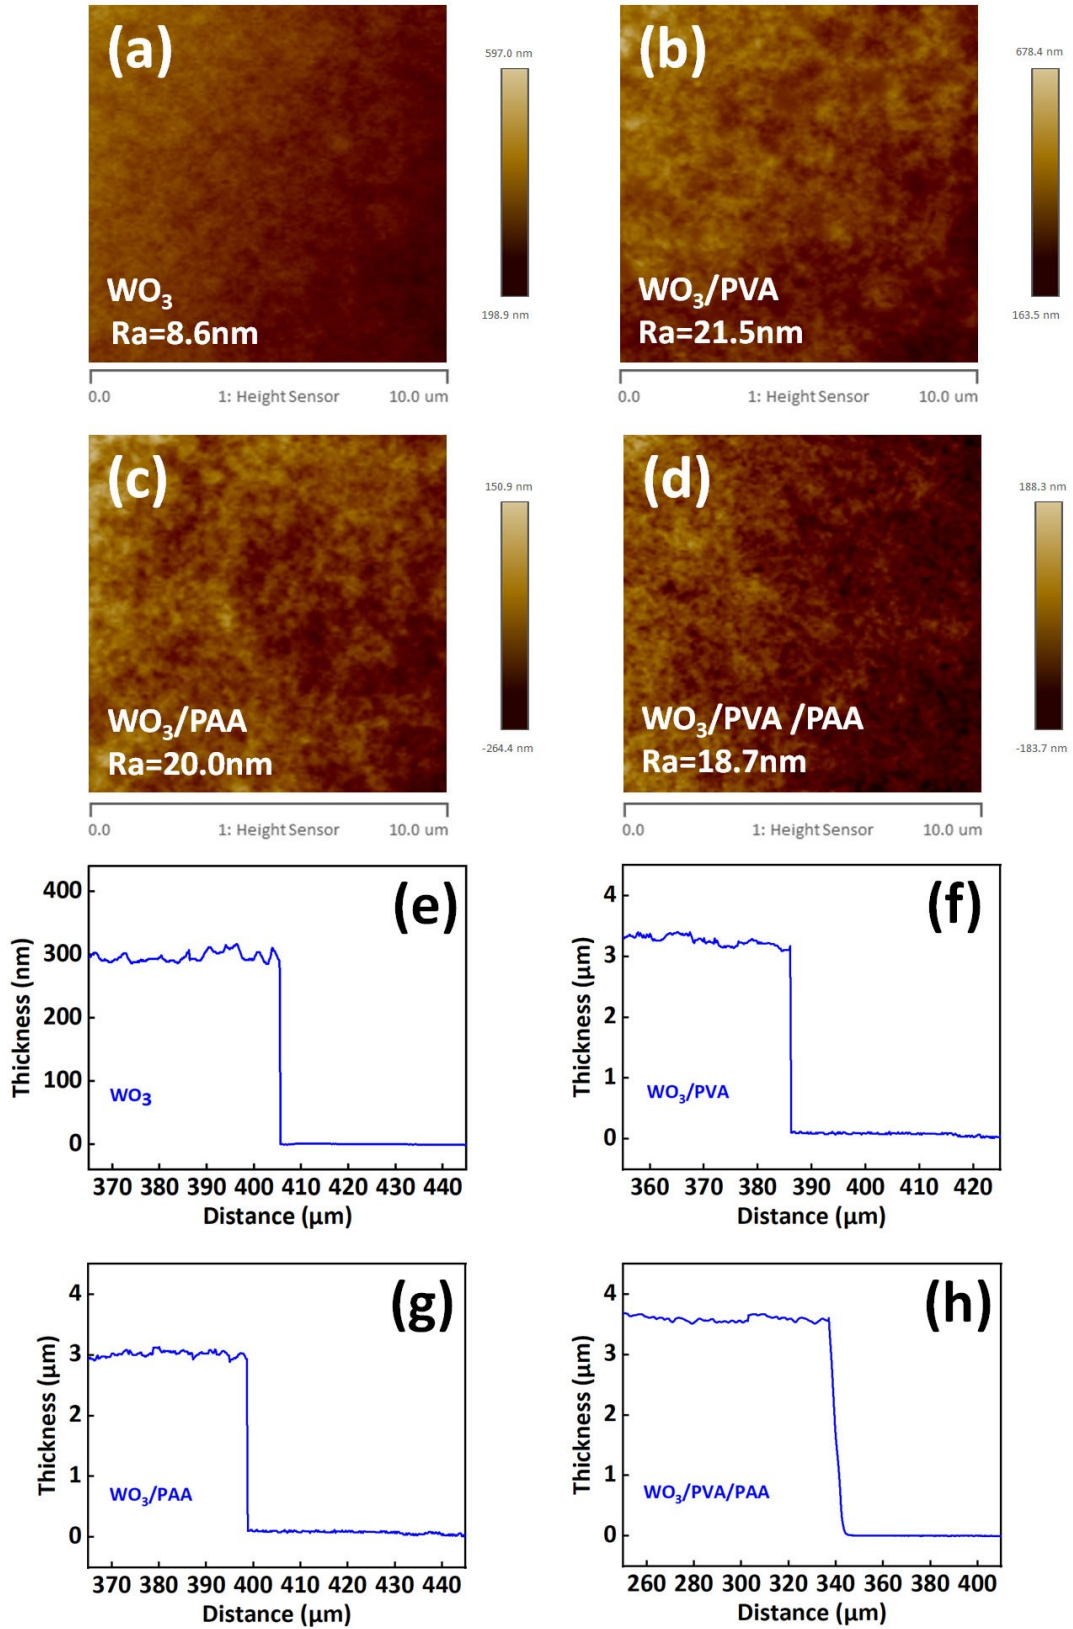

**Figure S1.** Surface flatness observed by AFM on (a)  $WO_3$ , (b)  $WO_3/PVA$ , (c)  $WO_3/PAA$  and (d)  $WO_3/PVA/PAA$  films. Thickness of (e) pure  $WO_3$ , (f)  $WO_3/PVA$ , (g)  $WO_3/PAA$  and (h)  $WO_3/PVA/PAA$  films determined by a probe optical profile-meter.

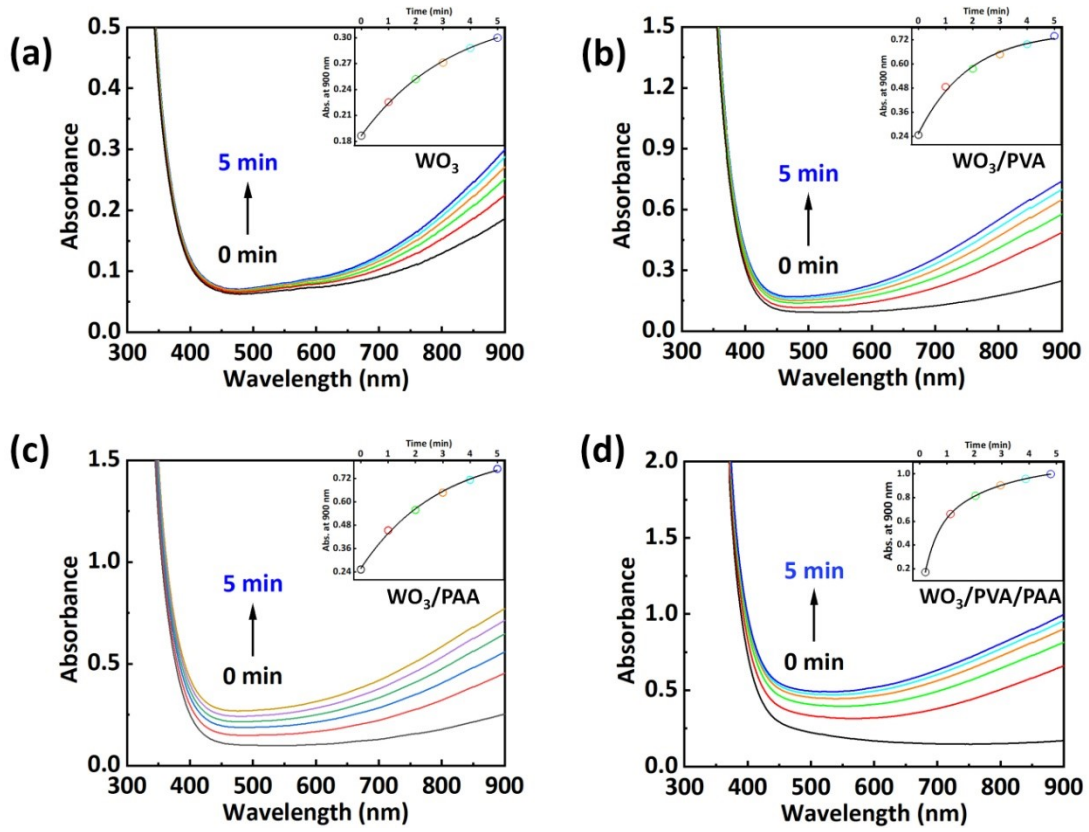

**Figure S2.** Absorption spectra of (a)  $\text{WO}_3$ , (b)  $\text{WO}_3/\text{PVA}$ , (c)  $\text{WO}_3/\text{PAA}$  and (d)  $\text{WO}_3/\text{PVA}/\text{PAA}$  films irradiated by blue-violet light. The insets show temporal evolution of absorbance at 900 nm and the corresponding theoretical fitting.

*In-situ* absorption spectra of the four kinds of nanocomposite films were measured under monochromatic irradiation. Absorption spectral curves at different irradiation times under blue-violet excitation for  $\text{WO}_3$ ,  $\text{WO}_3/\text{PVA}$ ,  $\text{WO}_3/\text{PAA}$  and  $\text{WO}_3/\text{PVA}/\text{PAA}$  films were obtained as shown in Figures S2. The absorbance of the four kinds of films increases gradually in the spectral range of 300-900 nm, and the color of the sample changes from colorless to blue. Temporal evolution of absorbance for  $\text{WO}_3$ ,  $\text{WO}_3/\text{PVA}$ ,  $\text{WO}_3/\text{PAA}$  and  $\text{WO}_3/\text{PVA}/\text{PAA}$  films was compared. Theoretical fitting to the absorbance at 900 nm with different irradiation times can be expressed as follows:

$$A(t) = [A(\infty) - A(0)] \cdot [1 - \exp(-kt)] + A(0) \quad (\text{S1})$$

, where  $A(t)$  is the absorbance at 900 nm versus time,  $A(0)$  and  $A(\infty)$  are the absorbance at  $t=0$  and  $t=\infty$ , respectively,  $k$  is the coloring rate constant. The theoretical fitting curves are shown in the insets of Figure S2 (solid lines). Here,  $k_{\text{WO}_3}=0.0049 \text{ s}^{-1}$ ,  $k_{\text{WO}_3/\text{PVA}}=0.0053 \text{ s}^{-1}$ ,  $k_{\text{WO}_3/\text{PAA}}=0.0073 \text{ s}^{-1}$  and  $k_{\text{WO}_3/\text{PVA}/\text{PAA}}=0.11 \text{ s}^{-1}$  were obtained. After introduction of PVA and PAA, the photo-response-time was shortened and the coloring process became faster.

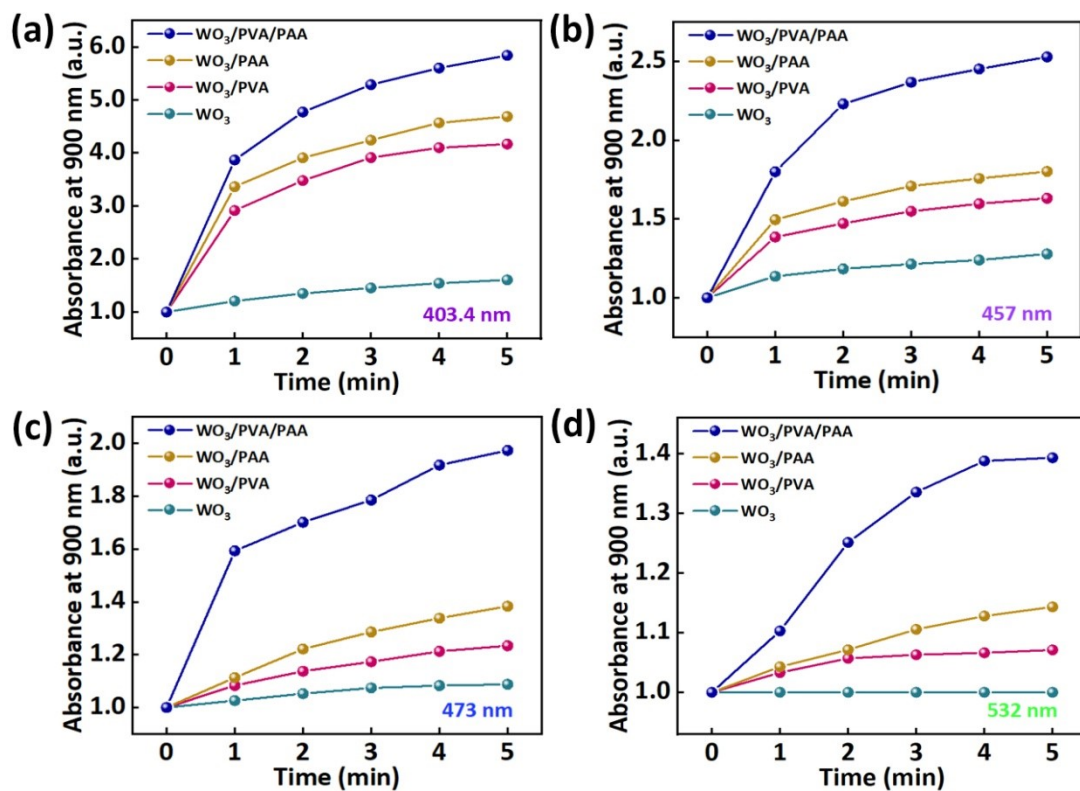

**Figure S3.** Absorbance at 900 nm versus irradiation time for  $\text{WO}_3$ ,  $\text{WO}_3/\text{PVA}$ ,  $\text{WO}_3/\text{PAA}$  and  $\text{WO}_3/\text{PVA}/\text{PAA}$  films with the exciting lights of (a) 403.4 nm, (b) 457 nm, (c) 473 nm and (d) 532 nm, respectively.

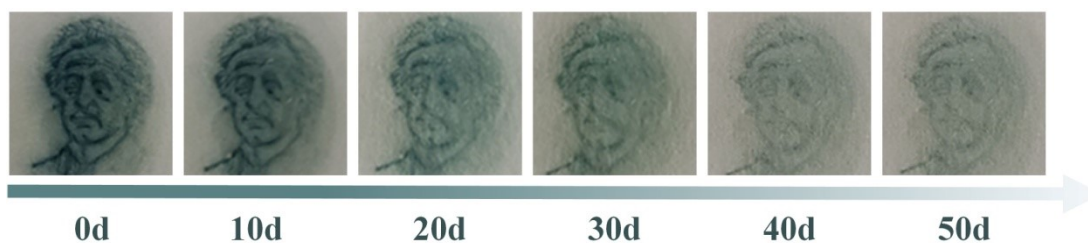

**Figure S4.** Long-term monitoring (0-50 day) of  $\text{WO}_3/\text{PVA}/\text{PAA}$  films loaded with optical information. The Einstein's image is optically printed by blue-violet light irradiation of 30 minutes.

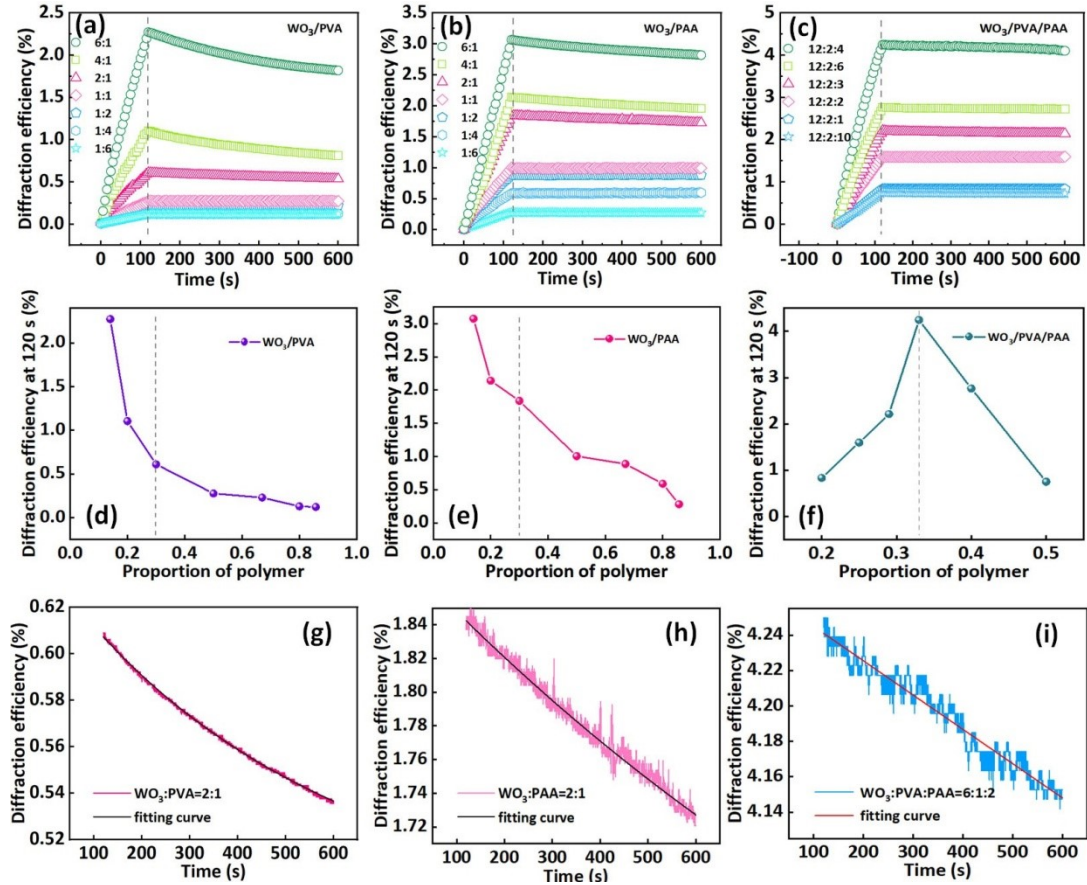

**Figure S5.** Diffraction efficiency versus time for (a)  $\text{WO}_3/\text{PVA}$ , (b)  $\text{WO}_3/\text{PAA}$ , and (c)  $\text{WO}_3/\text{PVA}/\text{PAA}$  films with different solution volume ratios. Diffraction efficiency at different proportions of polymer in (d)  $\text{WO}_3/\text{PVA}$ , (e)  $\text{WO}_3/\text{PAA}$ , and (f)  $\text{WO}_3/\text{PVA}/\text{PAA}$  films. For example, 0.33 on horizontal axis means that when the volume ratio of  $\text{WO}_3$  ink to polymer solution is 2:1, the proportion of polymer is defined as  $1/(2+1) \approx 0.33$ . Decay of holographic kinetics from 120s to 600 s for three kinds of samples of (g)  $\text{WO}_3:\text{PVA} = 2:1$ , (h)  $\text{WO}_3:\text{PAA} = 2:1$ , and (i)  $\text{WO}_3:\text{PVA}:\text{PAA} = 6:1:2$ .

We precisely adjusted the parameters and carried out experiments on the effect of sample mixture ratio on optical storage performance. Firstly,  $\text{WO}_3$  is mixed with PVA and PAA according to different volume ratios, and the setting ratios are 1:6, 1:4, 1:2, 1:1, 2:1, 4:1 and 6:1, respectively. Figures S5 (a) and (b) show the holographic dynamic curves of  $\text{WO}_3/\text{PVA}$  and  $\text{WO}_3/\text{PAA}$  films with different volume ratios, respectively. Obviously, with the increase of  $\text{WO}_3$  volume fraction, the diffraction efficiency of  $\text{WO}_3/\text{PVA}$  and  $\text{WO}_3/\text{PAA}$  films is significantly improved under the irradiation of coherent lights. However, when the volume ratio of  $\text{WO}_3$  to PVA or to PAA reaches 4:1, the issue of destructive readout from 120 s to 600 s appears. This phenomenon is explained as the increase of  $\text{WO}_3$  content leads to monomer aggregation, light scattering and the insufficient number of protons and electrons. It is difficult for  $\text{WO}_3$  nanoparticles to undergo a spatially-modulated photochromic reaction in different regions of interference fringes. Next, setting  $\text{WO}_3/\text{PVA}$  mixed

solution with a volume ratio of 6:1 as the basic sample, different volumes of PAA are added to make the volume ratios 12:2:1, 12:2:2, 12:2:3, 12:2:4, 12:2:6 and 12:2:10, respectively. As shown in Figure S5(c), the readout stability of interference fringes is significantly improved after adding PAA to the  $\text{WO}_3/\text{PVA}$  mixed solution with a volume ratio of 6:1. However, when adding a small amount of PAA, the diffraction efficiency of  $\text{WO}_3/\text{PVA}/\text{PAA}$  is much lower than that without PAA, which may be caused by the decrease of actual volume fraction of  $\text{WO}_3$ . When the volume ratio of  $\text{WO}_3/\text{PVA}/\text{PAA}$  is 12:2:4 (i.e. 6:1:2), the diffraction efficiency and readout stability of the hybrid film are both improved significantly. Then further adding PAA causes that the diffraction efficiency of  $\text{WO}_3/\text{PVA}/\text{PAA}$  hybrid film is weakened greatly. Therefore, we choose  $\text{WO}_3/\text{PVA}/\text{PAA}$  hybrid film with a ratio of 6:1:2 as the optimized recording medium of holographic grating.



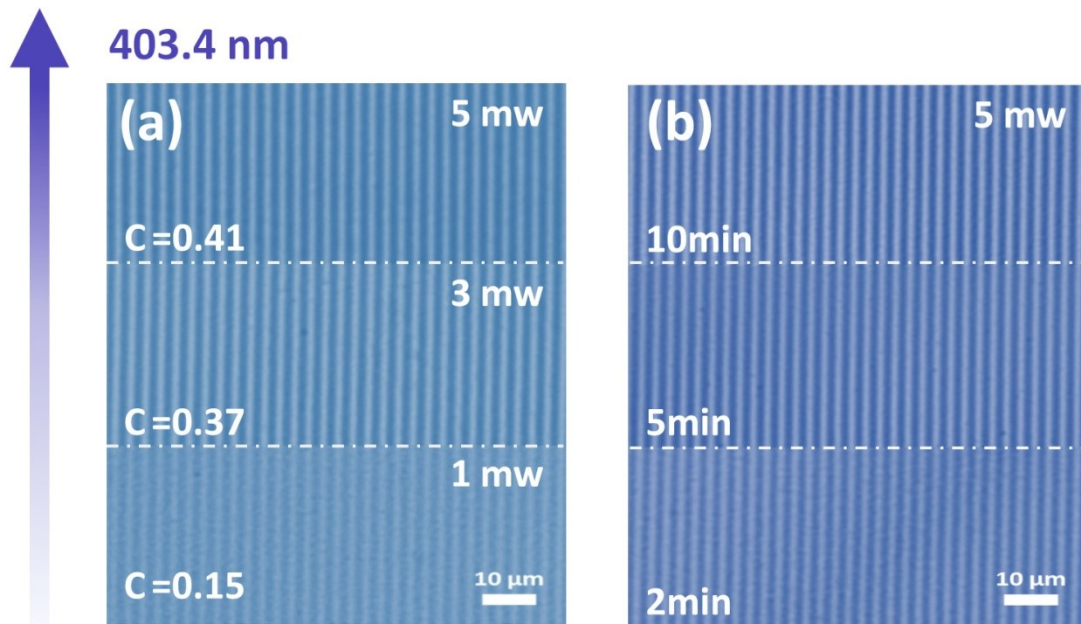

**Figure S6.** Polarized optical microscope image of holographic fringes in  $\text{WO}_3/\text{PVA}/\text{PAA}$  films at (a) different writing powers, and (b) different writing times.

Diffraction gratings were selectively recorded with two linearly *s*-polarized laser beams (403.4 nm, TOPTICA Photonics; 457 nm, 473 nm and 532 nm, Changchun New industries Optoelectronics Tech. Co. Ltd., respectively). The angle between the writing beams was fixed at  $9^\circ$ . Grating period was calculated according to the equation  $\Lambda = \lambda / 2\sin(\theta/2)$ , where  $\lambda$  is the wavelength of writing beams. For example,  $\Lambda = 2.58 \mu\text{m}$  for the holographic recording at 403.4 nm.

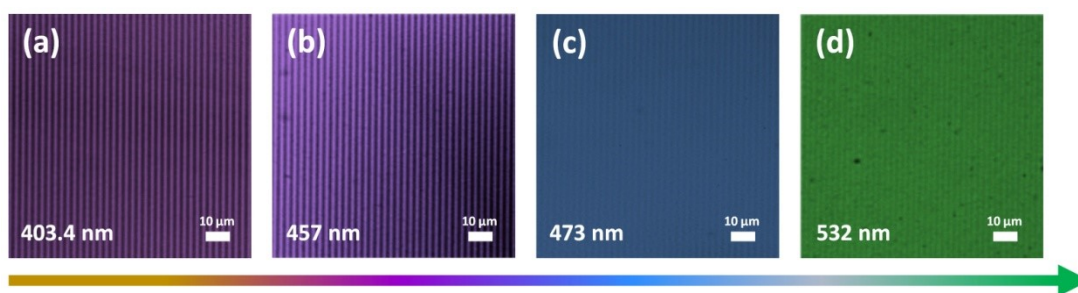

**Figure S7.** Holographic fringes formed in  $\text{WO}_3/\text{PVA}/\text{PAA}$  nanocomposite film under (a) 403.4 nm, (b) 457 nm, (c) 473 nm, and (d) 532 nm irradiations, respectively.

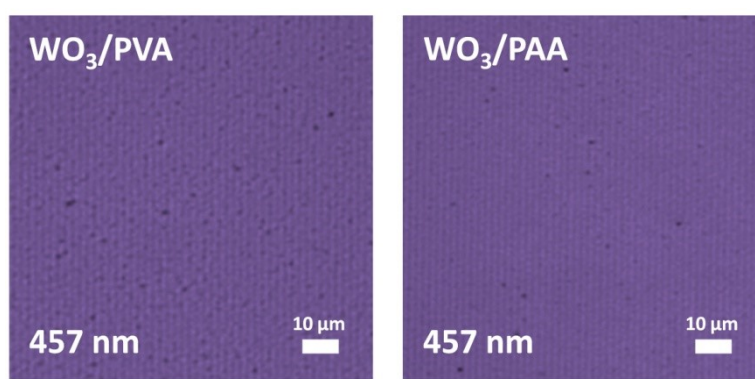

**Figure S8.** Holographic fringes formed in  $\text{WO}_3/\text{PVA}$  and  $\text{WO}_3/\text{PAA}$  nanocomposite films under the 457 nm irradiation.
